# Supplementary material for: Construction of in situ self-assembled FeWO4/g-C3N4 nanosheet heterostructured Z-scheme photocatalysts for enhanced photocatalytic degradation of rhodamine B and tetracycline
Source: Royal Society of Chemistry journal article supplement (doi:10.1039/c8na00041g), 2018-09-04
Supplement: c8na00041g1.pdf [file c8na00041g1.pdf]

**Supporting information**

**Construction of In situ Self-assembled FeWO<sub>4</sub>/g-C<sub>3</sub>N<sub>4</sub> nanosheet**

**Heterostructured Z-scheme Photocatalysts for Enhanced Photocatalytic**

**Degradation of Rhodamine B and Tetracycline**

Ramakrishna Dadigala <sup>a</sup>, RajKumar Bandi <sup>a</sup>, Bhagavanth Reddy Gangapuram <sup>a, b</sup>, and  
Veerabhadram Guttena <sup>a,\*</sup>

<sup>a</sup>Department of Chemistry, Osmania University, Hyderabad, Telangana state, 500007, India.

<sup>a</sup>Department of Chemistry, PG Center Wanaparthy, Palamuru University, Mahabub Nagar,  
Telangana State, 509001, India.

\*Corresponding author. Email address: [gybhadram@gmail.com](mailto:gybhadram@gmail.com)

## 1. Materials

Melamine, ethylene glycol, ferric chloride hexahydrate, sodium tungstate dihydrate, sodium acetate, ammonium oxalate, iso-propanol, Terephthalic acid and Rhodamine B were obtained from S. D. Fine Chemicals, Mumbai, India. 1, 4-benzoquinone and Tetracycline were purchased from Sigma-Aldrich, India. All the chemicals used in this study were of analytical grade and were used without further treatment and double distilled water was used throughout this study.

## 2. Characterization

The crystal structure and phase purity of the as-prepared samples was characterized by powder X-ray diffraction (XRD) using the Cu-K $\alpha$  radiation ( $\lambda=0.15406$  nm) on a Rigaku Miniflex 600 X-ray Powder Diffractometer in the  $2\theta$  range of  $10^\circ\sim 80^\circ$ . Scanning electron microscopy (SEM, ZEISS, EVO 18) and transmission electron microscopy (TEM, Tecnai G<sup>2</sup> 20 (FEI) S-Twin) were utilized to characterize the morphologies and microstructures of the samples and high resolution transmission electron microscopy (HRTEM) image were also recorded on a Tecnai G<sup>2</sup> 20 (FEI) S-Twin microscope. The Energy-dispersive spectroscopy (EDS) measurements were performed with X-ray energy dispersive spectrometer installed on a ZEISS, EVO 18 microscope. X-ray photoelectron spectroscopy (XPS) analysis was performed on a Kratos AXIS Ultra spectrometer using Al K $\alpha$  as an X-ray source (1486.71 eV). Fourier transform infrared (FTIR) spectra of the samples was recorded on a Shimadzu IR Prestige-21 spectrophotometer using the KBr pellet technique. UV–vis diffuse reflectance spectra (DRS) were recorded on a Shimadzu UV-3600 UV–Vis-NIR spectrophotometer using BaSO<sub>4</sub> as a reference. The photoluminescence (PL) spectra were measured on a JASCO FP-8500 spectrofluorometer with an excitation wavelength of 360 nm.

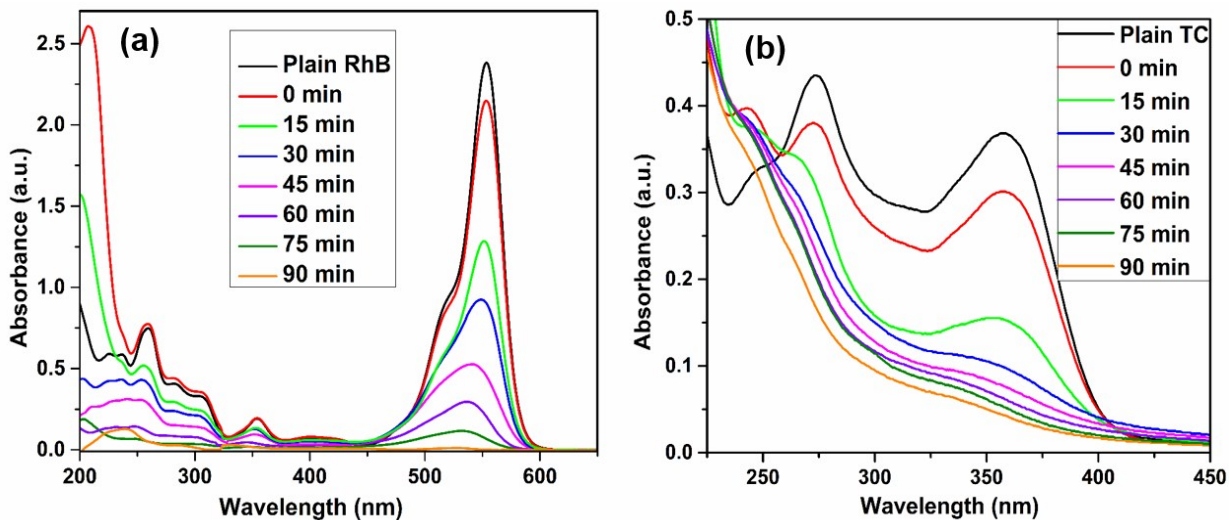

**Fig. S1** Time-dependent Uv-vis absorption spectra of (a) RhB and (b) TC solution over the 10-FWO/CNNs composite.

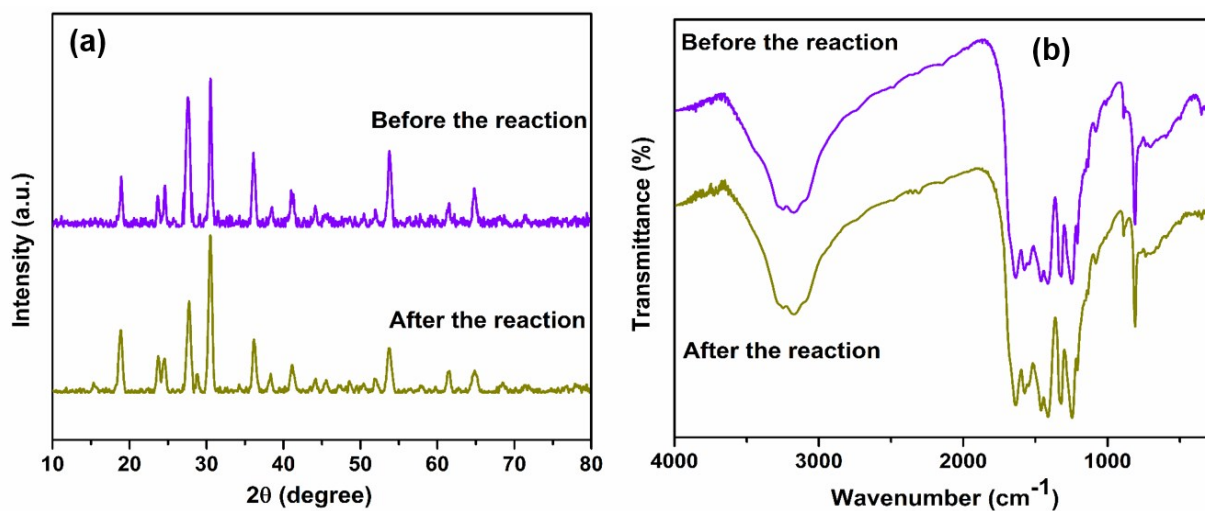

**Fig. S2** (a) XRD patterns and (b) FTIR spectra of the 10-FWO/CNNs composite before and after photocatalytic reaction.
